1 MisMatch Negativity-study showing pre-lexical sensitivity to both primary Final  
2 Accent and secondary Initial Accent in French

3 Noémie te Rietmolen<sup>1</sup>, Radouane El Yagoubi<sup>2</sup>, and Corine Astésano<sup>1</sup>

4 <sup>1</sup>Octogone-Lordat, University Jean-Jaurès — Toulouse

5 <sup>2</sup>CLLE-LTC, University Jean-Jaurès — Toulouse

6  
7 **Abstract**

8 In French, accentuation is not lexically distinctive and tightly intertwined with intonation. This has led  
9 to the language being described of as ‘a language without accent’ and to French listeners being alleged  
10 ‘deaf to stress’. However, if one considers Di Cristo’s model in which the metrical structure of speech plays  
11 a central role, it becomes possible to envision stress templates underlying the cognitive representation of  
12 words. This event-related potential (ERP) study examined whether French listeners are sensitive to the  
13 French primary final accent (FA) and secondary initial accent (IA), and whether the accents are part of  
14 the French phonologically expected stress pattern. Two oddball studies were carried out. In the first study,  
15 in one condition, deviants were presented without (−FA) and standards with final accent (+FA), while  
16 in another condition, these positions were switched. We obtained asymmetric MMN waveforms, such that  
17 deviants −FA elicited a larger MMN than deviants +FA (which did not elicit an MMN), pointing toward a  
18 preference for stress patterns with FA. Additionally, the difference waveforms between identical stimuli in  
19 different positions within the oddball paradigms indicated −FA stimuli to be disfavored whether they were  
20 the deviants or the standards. In the second study, standards were always presented with both the initial  
21 and final accent, while deviants were presented either without final accent (−FA) or without initial accent  
22 (−IA). Here, we obtained MMNs both to deviants −FA and to deviants −IA, although −FA deviants  
23 elicited a more ample MMN. Nevertheless, the results show that French listeners are not deaf to the initial  
24 and final accents, pointing instead to an abstract phonological representation for both accents. In sum, the  
25 results argue against the notion of stress deafness for French and instead suggest accentuation to play a  
26 more important role in French speech comprehension than is currently acknowledged.

## 27 1 Introduction

28 French accentuation holds a low phonological and post-lexical status, i.e. it is not considered to directly apply  
29 to the word domain, but, instead, held to belong to the phrase. This means that the accents have post-lexical  
30 functions, and are not thought to contribute to word processing. For instance, French accents may signal  
31 phrase boundaries or present the utterance's information structure, but they can never distinguish the semantic  
32 content of a word. Two (surface-level) group accents are generally recognized in French, the final accent (FA)  
33 and the initial accent (IA). FA is the primary stress, obligatory marking the right boundary of the accentual  
34 phrase (AP; Jun & Fougeron, 2000) with a lengthened syllable rime, sometimes supported by an additional  
35 fluctuation in  $f_0$ . This accent is the compulsory accent in French and falls on the last syllable of the last word  
36 of AP, i.e. FA typically co-occurs with the right prosodic constituent boundary. The second accent, IA, is the  
37 secondary stress, optionally marking the left boundary of AP. This accent is primarily cued by a rise in  $f_0$  and a  
38 secondary lengthening of the syllabic onset (Astésano, 2001). IA is mostly associated with its rhythmic function,  
39 i.e. it intervenes when a long stretch of syllables is pronounced without FA (a so-called stress lapse). French  
40 accentuation is thus not lexically distinctive and tightly intertwined with post-lexical, intonational prominence.  
41 These two properties of accentuation have led the existence of the accent being questioned for French (Rossi,  
42 1980), and to the notion of French as *a language without accent* becoming the generally accepted view on  
43 French prosody, such that accentuation was attributed a rather trivial role in speech processing. Indeed, as  
44 some authors have argued, if French language does not know lexical stress, it is reasonable to assume that its  
45 speakers are confronted with stressed syllables too infrequently to be able to hear the accents (e.g. Dupoux  
46 et al., 1997). That is, the rare interactions with local prominences in 'a language without accent' are pre-  
47 sumed insufficient for speakers to develop a sensitivity to accentual information, essentially leaving them 'deaf  
48 to stress'.<sup>1</sup> Because listeners can still readily decode speech, despite their supposed 'phonological deafness',  
49 it—according to these scholars—stood to reason that accentuation is unlikely to play an important function in  
50 French comprehension processes. Consequently, French accentuation has attracted rather little interest in the  
51 linguistic field.

52 However, if one considers Di Cristo's model in which the metrical structure of speech plays a central role  
53 (Di Cristo, 2000), it becomes possible to envision the accents to be encoded in stress templates underlying the  
54 cognitive representation of the lexical word. In turn, if stress templates are phonologically encoded at the level  
55 of the word, they may readily contribute to speech comprehension. Studies investigating the phonological  
56 status of French accentuation have indeed reported results in favor of a sensitivity to the metrical structure of  
57 words. Not only were metrical incongruences (stress on the medial syllable, a violation in French) found to slow  
58 down semantic processing (Magne et al., 2007), but a series of perception studies showed both the initial accent  
59 (IA) and final accent (FA) to be metrically strong, independent from phrase boundaries (e.g. Astésano et al.,  
60 2012; Garnier et al., 2016; Garnier, 2018). Furthermore, in two studies directly addressing the perception of  
61 FA, participants showed little difficulty recognizing whether or not words were marked with the primary stress  
62 (Michelas et al., 2016, 2018), contradicting the notion of 'stress deafness' for French. Finally, the 'optional',  
63 secondary stress (IA) has been shown to not only be readily perceived but even expected by listeners (e.g.  
64 Jankowski et al., 1999; Aguilera et al., 2014; Astésano, 2017). That is, perception studies have shown IA to be  
65 perceived even when its phonetic correlates are suppressed or when its  $f_0$  rise peaks further along on the word,  
66 pointing towards a metrical expectation for the accent (Jankowski et al., 1999; Astésano & Bertrand, 2016;  
67 Garnier et al., 2016; Astésano, 2017; Garnier, 2018). Moreover, results from a recent MisMatch Negativity  
68 study investigating the representation of IA not only provided additional evidence against the notion of stress

---

<sup>1</sup> Note that while the term 'stress deafness', when taken literally, implies a phonological deafness for French listeners, and is in fact often interpreted as such, Dupoux et al. (1997) intended for a more nuanced interpretation, wherein speakers of languages with fixed, non-distinctive stress do not encode stress templates into their mental lexicon and are consequently less sensitive to variable, lexically distinctive stress in foreign languages.

69 deafness in French but also indicated a long-term memory representation and phonological preference for IA  
70 (Aguilera et al., 2014; Astésano et al., *in prep*).

71 Indeed, the MisMatch Negativity component (MMN) has proven a valuable tool in the study of metrical  
72 stress processing during speech comprehension. The MMN is argued to be the prototypical component for  
73 prediction mismatching input (e.g. Näätänen et al., 2007; Garrido et al., 2009; Winkler et al., 2009; Denham &  
74 Winkler, 2017). The MMN is a pre-attentive, fronto-central negative deflection peaking around 250 ms after the  
75 detection of a regularity violation (Näätänen et al., 1997) and its amplitude is held to reflect the magnitude of  
76 the deviance from what was expected (Sussman, 2007; Näätänen et al., 2007; Sussman et al., 2014; Sussman  
77 & Shafer, 2014). Such deviance can be purely acoustic (bottom-up) or it can be a deviance from a top-down  
78 derived prediction which is based on long-term memory representations (e.g. Winkler et al., 2009; Garrido  
79 et al., 2009). In the latter case, the MMN can thus index the strength of memory traces.

80 MMNs are typically investigated in an oddball paradigm wherein a low-probability stimulus (the oddball,  
81 or deviant) occurs within a train of high-probability stimuli (Näätänen et al., 2007). The frequently occurring  
82 standard stimuli are assumed to develop predictions that are subsequently violated by the infrequently occur-  
83 ring deviant stimulus. The standard and deviant stimuli will usually be very similar acoustically, contrasting  
84 only on the phonological property of interest in the investigation (e.g. phoneme or stress pattern). The MMN is  
85 then obtained by subtracting the ERP elicited by the standard from the ERP elicited by the deviant. Therefore,  
86 the MMN represents the difference between the neural response to the frequently occurring standard stimulus  
87 and the infrequently occurring deviant stimulus, i.e. the MMN is a ‘difference wave’ that reflects the status of  
88 the manipulated phonological feature.

89 Importantly, whereas an MMN may be elicited by a purely acoustic difference, many studies will additionally  
90 switch the position of the deviant stimulus and the standard stimulus, such that they have another condition,  
91 wherein the deviant is presented frequently, while the (formerly) standard stimulus is presented infrequently  
92 (e.g. Honbolygó & Csépe, 2013; Aguilera et al., 2014; Scharinger et al., 2016, see also Astésano et al. *in prep*).  
93 If the standard and deviant stimuli differ only acoustically, the MMNs in both conditions should be similar. Often,  
94 however, MMN amplitudes will differ, presumably due to a more established representation for one type of  
95 stimulus over the other. That is, repeatedly presenting a stimulus with a firm phonological representation, only  
96 builds on its probability leading to a large mismatch response when its anticipation is violated. In the reverse  
97 situation, when a train of improbable standards is interrupted by a more probable deviant, the violation, and  
98 thus the mismatch response, is much smaller. So, switching the positions of the standard and deviant stimuli  
99 allows for more substantial inferences on the phonological or long-term memory foundation of the manipulated  
100 phonological entity (e.g. Winkler et al., 2009; Garrido et al., 2009) and, as such, the MMN has had a substantial  
101 contribution in investigations of underspecification of phonemic representations (e.g. Eulitz & Lahiri, 2004;  
102 Näätänen et al., 2007; Winkler et al., 2009; Deguchi et al., 2010; Ylinen et al., 2016; Scharinger et al., 2016,  
103 2017), as well as the phonological representation of stress patterns (e.g. Ylinen et al., 2009; Honbolygó et al.,  
104 2004; Honbolygó & Csépe, 2013; Aguilera et al., 2014; Honbolygó et al., 2017; Garami et al., 2017).

105 For instance, Honbolygó et al. (2004) investigated processing difficulties of stress patterns in Hungarian  
106 participants. The standard in their oddball study was a disyllabic word with trochaic stress, the typical stress  
107 pattern in Hungarian, while the deviant carried an iambic stress pattern. The deviant elicited two different  
108 MMNs: one in response to the lack of the typical and expected stress on the first syllable, and another to the  
109 atypical additional stress on the second syllable. In a follow-up study, the trochaic and iambic stress pattern  
110 served both as standards and deviants in two separate blocks (Honbolygó & Csépe, 2013). Again, the results  
111 indicated that the deviant with an iambic stress pattern elicited two consecutive MMNs, however, when the  
112 trochaic patterns had been the deviant, no MMN followed. The authors argued that the unfamiliar iambic  
113 stress pattern mismatched both the short and long-term memory representations, and, therefore, elicited the  
114 MMNs, while the typical (and thus expected) trochaic stress pattern did not elicit any MMN because it did not

115 mismatch the long-term memory representation of word stress in Hungarian. These findings provide evidence  
116 that processing of stress pattern changes relies on language-specific long-term memory representations and  
117 may revealed in MMN investigations (see also Ylinen et al., 2009, for similar results).

118 As mentioned above, in a study addressing the phonological status of the French initial accent (IA), Aguilera  
119 et al. (2014) showed that IA is not only perceived, but anticipated by listeners as belonging to the abstract  
120 representation of the word (see also Astésano et al., *in prep*). The authors manipulated the phonetic realization  
121 of IA on trisyllabic words in an oddball paradigm. Participants either listened to a version of the oddball-task  
122 wherein the stimulus +IA was in the standard position and the word -IA in the deviant position, or a version  
123 wherein  $\pm$ IA positions were reversed. All listeners completed two tasks, one passive task during which they  
124 listened to the stimuli while attending a silent movie, and one active task during which the listeners were asked  
125 to respond as quickly and accurately as possible when they detected the deviant stimulus. Results indicated that  
126 the listeners clearly distinguished between the trisyllabic words carrying IA and those that did not. This again  
127 indicates that French listeners are in fact not deaf to stress, but readily perceive the accentual manipulation.  
128 Interestingly, the authors additionally observed an asymmetry between the MMN elicited by +IA deviants and  
129 the MMN following -IA deviants. That is, when the deviant had been presented without initial accent, a clear  
130 MMN component emerged, while this MMN was significantly smaller when the deviant was presented with ini-  
131 tial accent. Not finding an MMN when presenting the oddball with IA indicates a long-term representation for  
132 the initial accent. Indeed, it is plausible that, if IA is part of a preferred stress template, only rarely presenting  
133 the template might make it the deviant within the experiment, but it does not make the template improbable.  
134 In other words, in the condition in which the oddball was presented with IA, while atypical in the context of  
135 the test, the oddball was still the expected stress template. Therefore, no MMN emerged.

136 In order to further ascertain that the observed MMNs were independent from differences in acoustic process-  
137 ing, Aguilera and colleagues carried out an additional analysis wherein they compared the MMNs resulting from  
138 the difference wave between -IA-deviants and -IA-standards to the difference wave between +IA-deviants  
139 and +IA-standards (i.e. between participants comparison). Again, results indicated that the difference be-  
140 tween stimuli without initial accent was significantly larger than the difference between stimuli with initial  
141 accent, allowing for the purely acoustic interpretation of the results to be ruled out. Finally, the behavioral  
142 results from the active task confirmed the interpretation of the ERP results. That is, the deviant stimuli -IA  
143 were slower to detect than the deviant stimuli +IA, and generated more detection errors. Overall, Aguilera and  
144 colleagues thus not only show that stimuli without IA are noticed by listeners, but also that IA is anticipated  
145 and attached to the metrical template underlying the representation of words.

146 In the current study, we set out to build on these findings and investigated the phonological representation  
147 of the French final accent in an oddball paradigm (FA). Following Di Cristo, we argue words to be encoded  
148 with bipolar stress templates underlying their representation, marking not only the left (IA) but also the right  
149 (FA) lexical boundary. Here we sought to determine whether FA is phonologically represented, similar as IA,  
150 and manipulated the presence of FA on trisyllabic words in an auditory oddball paradigm. In a first study,  
151 participants took part in an oddball paradigm wherein either the standard word was presented with final accent  
152 and the deviant was presented without, or vice versa. In a second study, standards were presented with their full  
153 bipolar stress templates, including both IA and FA, while deviants were either presented without FA or without  
154 IA. We expected that, if words are encoded with both accents underlying their phonological representation,  
155 then  $\pm$ FA deviants should result in asymmetrical MMNs, similar as  $\pm$ IA deviants.

## 156 1.1 MisMatch Negativity: Final Accent

### 157 1.1.1 Methods: Final Accent

158 **Participants** The study was conducted in accordance with the Declaration of Helsinki. 21 French native  
159 speakers, aged 19 – 31 (mean age 24.0), gave their informed consent and volunteered to take part in the  
160 study. All subjects were right-handed, with normal hearing abilities and no reported history of neurological or  
161 language-related problems. Two subjects were excluded from the EEG-analysis due to excessive artifacts in the  
162 signal.

163 **Speech stimuli** Two trisyllabic French nouns were used in the current experiment ('casino' ([kazino], *casino*)  
164 and 'paradis' ([pavadi], *paradise*). The stimuli were extracted from sentences spoken by a naïve native speaker  
165 of French. Stimuli with the most natural FA (+FA) (i.e. a third syllable that was minimally 25% longer in  
166 duration than the preceding unaccented medial syllable, the primary phonetic parameter of FA Astésano, 2001)  
167 were selected by a panel of three experts. The metrical condition ( $\pm$ FA) was created by shortening the duration  
168 of the third syllable (FA) of the target word such that it approximated the medial, unaccented syllable and  
169 did not end in a final rise of  $f_0$  (the two main phonetic signatures of FA). This procedure was first performed  
170 automatically using a customized script in PRAAT (Boersma & Weenink, 2016) which cut the waveform, and  
171 then fine-tuned manually to correct perceptual bursts. Further, in order to keep a natural sound to the stimuli,  
172 an additionally fade-out was applied by filtering the end of the sound files with the latter half of a Hanning  
173 window.

174 In order to avoid MMNs reflecting purely durational difference between the stimuli (i.e. total word length  
175  $-$ FA being shorter than the total length of words  $+$ FA) (e.g. Jacobsen & Schröger, 2003; Colin et al.,  
176 2009; Honbolygó et al., 2017) and make sure the MMNs had similar onset latencies between the metrical  
177 conditions, durations were equalized between  $\pm$ FA stimuli by shortening the first two syllables of  $+$ FA  
178 stimuli. To additionally avoid confounds from shortening the two initial syllables, these first two syllables  
179 were shortened below the perceptual threshold following Rossi (1972) and Klatt (1976). To verify that the  
180 durational modulations on the first two syllables were not perceptible, two independent French phonetic experts  
181 completed with an XO-task wherein they listened to word pairs that were either both manipulated on the first  
182 two syllables (25%), both without the durational manipulation (25%), or one with and the other without  
183 (50%). The listeners judged whether the two words were identical or different. Only stimuli with accuracy  
184 rates that were at or below chance-level were admitted in the current corpus (see figure 1 for an overview of  
185 the stimuli for both the current and second oddball study and table 1 for an overview of acoustic properties).  
186 This led to total word durations of 503 ms for 'casino' and 460 ms for 'paradis', with third syllable durations  
187 of 233.3 ms and 178.8 ms for 'casino'  $+$ FA and  $-$ FA, and 225.9 ms and 142.3 ms for 'paradis'  $+$ FA and  
188  $-$ FA (see also table 1).

189

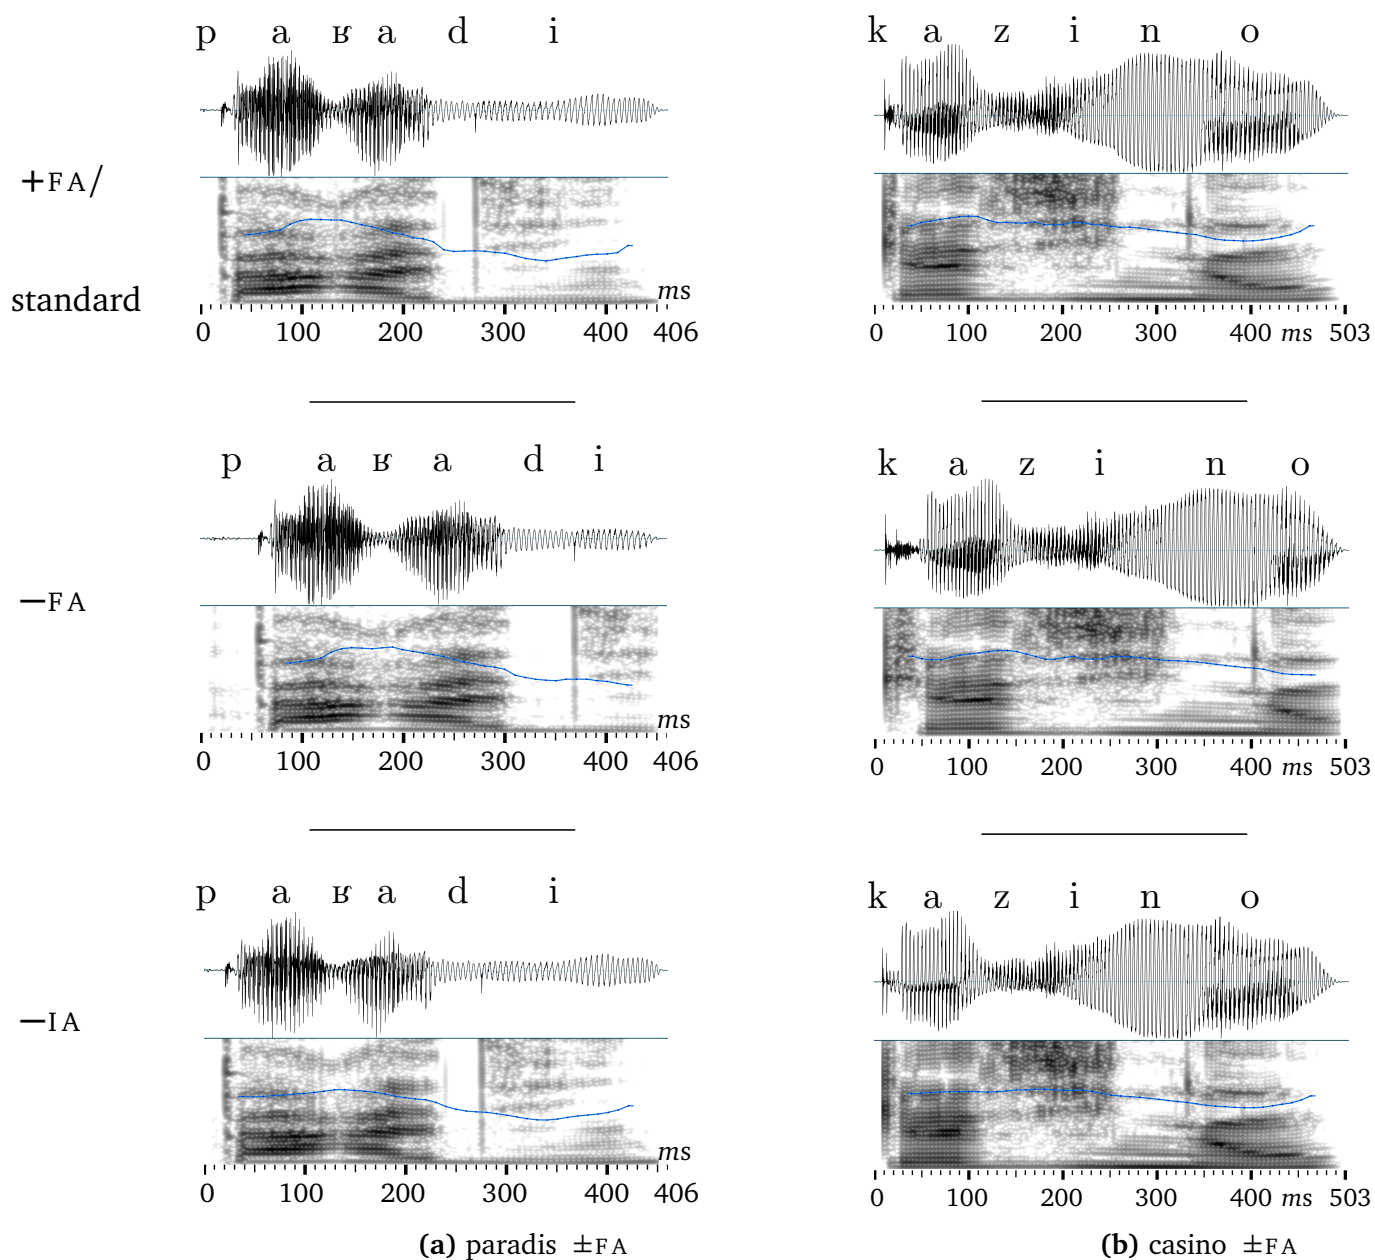

**Figure 1:** *paradis* ('paradis', left) and [kazino] ('casino', right) +FA/standard (top) and -FA (middle) and -IA (bottom). The two waveforms and associated pitch tracks show how syllable duration was shortened substantially for the final syllable, and moderately for the initial two syllables.

**Table 1:** Overview of durational and  $f_0$  values, plus the timing of the third syllable (holding  $\pm$ FA) onset for both ‘casino’ and ‘paradis’. Note that the +FA stimulus (top) served as the standard in the second oddball study which is presented below.

|              | Total duration |       | 1st syllable |       | 2nd syllable |       | 3rd syllable |       | 3rd syllable onset |
|--------------|----------------|-------|--------------|-------|--------------|-------|--------------|-------|--------------------|
|              | ms             | $f_0$ | ms           | $f_0$ | ms           | $f_0$ | ms           | $f_0$ |                    |
| CASINO       |                |       |              |       |              |       |              |       |                    |
| +FA/standard | 503.0          | 235.2 | 112.9        | 252.8 | 157.1        | 243.1 | 233.3        | 219.2 | 290.8              |
| dev-IA       | 503.0          | 231.7 | 112.9        | 241.4 | 157.1        | 241.7 | 233.3        | 218.8 | 290.8              |
| dev-FA       | 503.0          | 238.8 | 146.9        | 250.5 | 201.8        | 243.3 | 178.8        | 218.2 | 351.4              |
| PARADIS      |                |       |              |       |              |       |              |       |                    |
| +FA/standard | 460.0          | 212.9 | 128.7        | 245.0 | 111.6        | 233.9 | 225.9        | 185.0 | 243.1              |
| dev-IA       | 460.0          | 208.5 | 128.7        | 228.4 | 111.6        | 225.3 | 225.9        | 186.0 | 235.0              |
| dev-FA       | 460.0          | 224.0 | 168.8        | 244.7 | 148.3        | 239.5 | 142.3        | 189.9 | 317.5              |

190 Because in MMN studies which set out to investigate word processing, it is generally recommended to  
 191 reduce stimulus variation between the standard and deviant as much as possible (Pulvermüller & Shtyrov,  
 192 2006; Honbolygó & Csépe, 2013), the oddball paradigm in the current study either presented only ‘casino’, or  
 193 only ‘paradis’. However, because we were interested in the phonological representation of FA, which should  
 194 be similar between the two words, the data obtained from both versions are combined in the analysis (see  
 195 below).

196 In both versions, there were a total of 1092 presentations, 986 standards and 106 deviants. The deviant  
 197 could be either -FA with +FA as standard, or +FA as deviant and -FA in standard position. This means  
 198 that there were a total of four versions of the oddball paradigm: (1) casino-deviant +FA, (2) casino-deviant  
 199 -FA, (3) paradis-deviant +FA, and (4) paradis-deviant -FA.

200 **Procedure** Each participant was comfortably seated in an electrically shielded and sound attenuated room.  
 201 Stimuli were presented through headphones using Python2.7 with the PyAudio library on a Windows XP 32-bit  
 202 platform. To ensure attention was diverted from the stimuli, participants watched a silent movie with no text  
 203 (*Best of mr. Bean*).

204 Lists were assigned randomly: 4 participants listened to the casino-deviant +FA version, 3 listeners to the  
 205 casino-deviant -FA version, 7 participants listened to paradis-deviant +FA and finally 5 participants had the  
 206 paradis-deviant -FA version. This meant that data was obtained from 11 participants for the version in which  
 207 +FA stimuli were in deviant position and -FA stimuli in standards, and from 8 participants for the version  
 208 wherein  $\pm$ FA positions were reversed.

209 Each participant listened to the complete list of 1092 stimuli (986 standards, 106 deviants) in one block,  
 210 which lasted approximately 25 minutes. Deviants were interspersed randomly and online, while avoiding two  
 211 consecutive occurrences and making sure that each list started with at least 25 standards. Finally, the inter-trial  
 212 interval (ITI) consisted of stimulus duration plus an inter-stimulus interval (ISI) of 600 ms.

213 **EEG recording and preprocessing** EEG data were recorded with 64 Ag/AgCl-sintered electrodes mounted  
 214 on an elastic cap and located at standard left and right hemisphere positions over frontal, central, parietal,  
 215 occipital and temporal areas (International 10/20 System; Jasper, 1958). The EEG signal was amplified by  
 216 BioSemi amplifiers (ActiveTwo System) and digitized at 2048 Hz.

217 The data were preprocessed using the EEGlab package (Delorme & Makeig, 2004) with the ERP1ab toolbox  
 218 (Luck et al., 2010) in Matlab (Mathworks, 2014). Each electrode was re-referenced offline to the algebraic

219 average of the left and right mastoids. The data were band-pass filtered between 0.01 – 30 Hz and resampled at  
220 128 Hz. Following a visual inspection, signal containing EMG or other artifacts not related to eye-movements  
221 or blinks was manually removed. Independent Components Analysis (ICA) was performed on the remaining  
222 data in order to identify and subtract components containing oculomotor artifacts. Finally, data were epoched  
223 from –0.2 to 1 seconds surrounding the onset of the stimulus and averaged within and across participants to  
224 obtain the grand-averages for each of the two stress conditions.

225 **Analysis** The method of EEG provides high temporal precision. However, the high temporal resolution  
226 comes at the cost of many comparisons when ERP amplitude values for each individual electrode, at each  
227 recorded time-point, are tested independently, using standard parametric statistics (e.g. ANOVA). Because  
228 EEG measures are not independent, but instead temporally and spatially correlated, we use a non-parametric  
229  $t_{\max}$  permutation test to analyze the data (Groppe et al., 2011; Luck, 2014) using the Mass Univariate ERP  
230 Toolbox (Groppe et al., 2011) in Matlab (Mathworks, 2014). We were interested in modulations of the MMN  
231 as elicited by the presence/absence of FA and therefore specifically tested for differences in the time-window  
232 between 551 – 651 ms. Furthermore, because the MMN is a fronto-centrally located deflection we selected the  
233 fronto-central electrodes (Fz, Cz, FC1, FC2, F3, F4, C3 and C4) for the statistical analyses. Each comparison of  
234 interest was analyzed with a separate repeated measures, two-tailed  $t$ -tests, using the original data and 2500  
235 random permutations to approximate the null distribution for the customary family-wise alpha ( $\alpha$ ) level of  
236 0.05.<sup>2</sup>

### 237 1.1.2 Results

238 We obtained no significant MMN when the deviant had been +FA (critical  $t$ -score:  $\pm 4.3095$ ,  $p = 0.8396$ , *ns*).  
239 This indicates that even though the +FA stress template was rare in the experimental setting, listeners *still*  
240 expected words to be marked with final accent. Presenting the deviant without final accent elicited a marginally  
241 significant MMN (critical  $t$ -score:  $\pm 4.2958$ ,  $p = 0.0652$ ). Visual inspection suggests the MMN was located at left  
242 frontal electrodes, starting 600 ms post stimulus onset (i.e.  $\sim 300$  ms post deviance detection). Furthermore,  
243 we observed an asymmetry between MMNs; the MMN was significantly more ample when the deviant had  
244 been presented –FA than when it had been presented +FA (critical  $t$ -score:  $\pm 3.1505$ ,  $p < 0.05$ , see figure 2),  
245 indicating a phonological preference for FA.

---

<sup>2</sup> In fact we used more than twice the number of permutations suggested for an alpha at 5% (Manly, 2006) so as to be even more certain of obtaining reliable results.



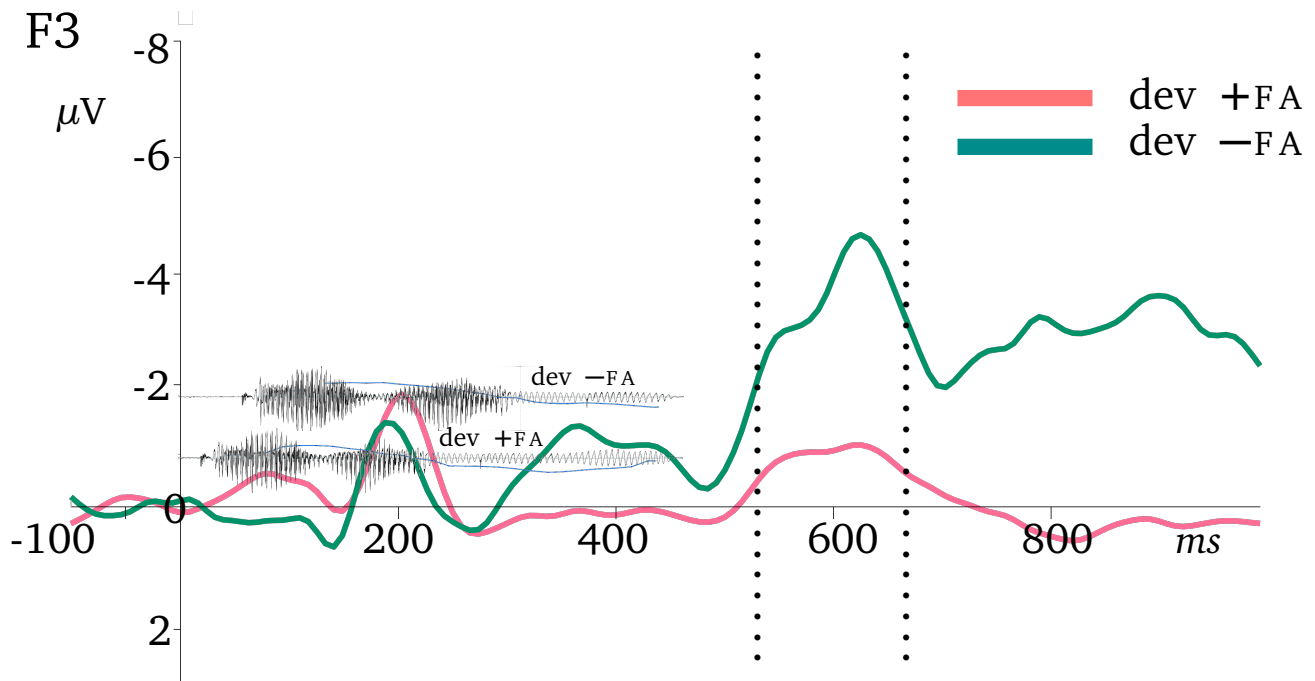

**Figure 2:** MMN components for +FA (in pink) and -FA (in green) deviants, recorded at the F3 (left frontal) electrode, with the oscillogram of the deviant stimuli [paʁaɖaɖi] plotted in the background. Waveforms and oscillograms are temporally aligned to indicate the relation between the offset of the  $\pm$ FA manipulation and the resulting stimulus-locked event-related potentials. The tested time-window is indicated by dashed vertical lines. For ease of presentation, ERP waveforms are low-pass filtered at 10 Hz and negativity is plotted as an upward deflection.

246 Finally, in the comparison between participants (i.e. comparing identical stimuli that differed in position  
 247 within the oddball experiment) there was a significant difference between +FA in deviant position versus  
 248 +FA in standard position at frontal (F4) and central (C4) electrodes during the whole time-window (critical  
 249  $t$ -score:  $\pm 3.7416$ ,  $p < 0.05$ ), while there was no such difference for stress templates -FA (critical  $t$ -score:  
 250  $\pm 4.394$ ,  $p = 0.84$ , *ns*, see figure 3).

251

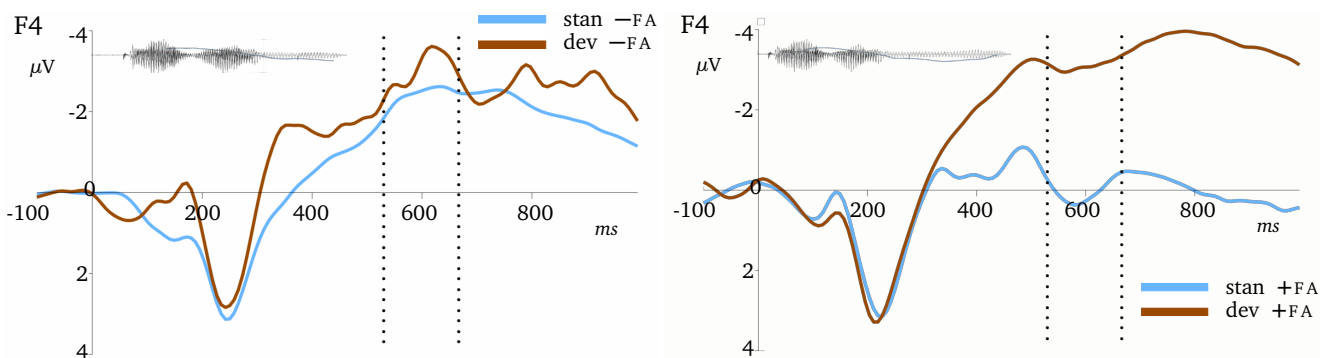

**Figure 3:** ERP components for -FA (left) and +FA (right) stimuli, recorded at the F4 (right frontal) electrode, with the oscillograms of [paʁaɖaɖi] plotted in the background to indicate the relation between the offset of the  $\pm$ FA manipulation and the resulting stimulus-locked ERPs. The tested time-window is indicated by dashed vertical lines. For ease of presentation, ERP waveforms are low-pass filtered at 10 Hz and negativity is plotted as an upward deflection.

252 Note that the results presented here partially contradict those reported in Aguilera et al. (2014) in which

253 IA had been manipulated. In Aguilera et al. (2014), the between listeners analysis demonstrated a bigger  
254 difference between standards and deviants when stimuli had been presented  $-IA$ , than when they had been  
255 presented  $+IA$ . This discrepancy indicates differential processing between  $IA$  and  $FA$ , which is elaborated  
256 upon in the main discussion of the two experiments.

## 257 1.2 MisMatch Negativity: Initial and Final Accent

### 258 1.2.1 Methods: Initial and Final Accent

259 **Participants** 20 French native speakers, aged 19 – 45 (mean age 23.7), took part in the study. None of  
260 the participants had taken part of the previous MMN study and all were right-handed, with normal hearing  
261 abilities and no reported history of neurological or language-related problems. Each of the participants gave  
262 their written consent and was paid a small fee for their participation.

263 **Speech stimuli** The same two trisyllabic French nouns used in the previous study, were used in the current  
264 experiment ('casino' ([kazino], *casino*) and 'paradis' ([paʁadi], *paradise*). The natural  $IA$  ( $+IA$ ) was re-  
265 synthesized without  $IA$  ( $-IA$ ) using a customized quadratic algorithm in Praat (Boersma & Weenink, 2016).  
266 Using the same algorithm as in Aguilera et al. (2014), the  $f_0$  value of the first vowel (i.e.  $IA$ ) was lowered near  
267 the  $f_0$  value of the preceding (unaccented) determinant, to de-accentuate the first syllable (i.e. remove  $IA$ ).  
268 The algorithm progressively modified the  $f_0$  values to reach the  $f_0$  value at the beginning of the last (accented)  
269 vowel. This quadratic transformation allowed for micro-prosodic variations to be maintained, thus keeping  
270 the natural sound of the stimuli. The  $+IA$  stimuli were forward and back transformed to equalize the speech  
271 quality between  $+IA$  and  $-IA$  stimuli (see Aguilera et al., 2014, for more information on the manipulation of  
272  $IA$ ). Refer to figure 1 and table 1 for an overview of stimuli properties for both words  $\pm IA$  and  $\pm FA$ . As in  
273 the previous study, we presented lists either only with 'casino', or only with 'paradis'. However, because we  
274 were interested in the phonological representation of the accent (whether  $IA$  or  $FA$ ), which should be similar  
275 between both words, the data obtained from both versions are again merged in the analysis.

276 **Procedure** Each participant was comfortably seated in an electrically shielded and sound attenuated room.  
277 Stimuli were presented through headphones using Python2.7 with the PyAudio library on a MacOS Sierra  
278 platform. Similar as in the previous experiment, participants watched a silent movie to ensure their attention  
279 was diverted from the stimuli. Each participant listened to all 1200 stimuli (1000 standards, 100 deviants  
280  $-IA$ , 100 deviants  $-FA$ ) in one block, which lasted for approximately 25 minutes. Deviants were interspersed  
281 randomly and online, while avoiding two consecutive occurrences of the same deviant and making sure that  
282 each list started with 25 standards. Finally, the same inter-trial interval (ITI) was used as in the previous  
283 oddball study, and consisted of stimulus duration plus inter-stimulus interval (ISI) of 600 ms.

284 **EEG recording and preprocessing** EEG data were recorded with 64 Ag/AgCl-sintered electrodes mounted  
285 on an elastic cap and located at standard left and right hemisphere positions over frontal, central, parietal,  
286 occipital and temporal areas (International 10/20 System; Jasper, 1958). The EEG signal was amplified by  
287 BioSemi amplifiers (ActiveTwo System) and digitized at 2048 Hz. The data were preprocessed using the  
288 EEGlab package (Delorme & Makeig, 2004) with the ERP1ab toolbox (Luck et al., 2010) in Matlab (Mathworks,  
289 2014). Each electrode was re-referenced offline to a common average reference. The data were band-pass  
290 filtered between 0.01 – 30 Hz and resampled at 256 Hz. Following a visual inspection, signal containing EMG  
291 or other artifacts not related to eye-movements or blinks was manually removed. Independent Components  
292 Analysis (ICA) was performed on the remaining data in order to identify and subtract components containing  
293 oculomotor artifacts. Finally, data were epoched from  $-0.2$  to 1 seconds surrounding the onset of the stimulus

294 and averaged within and across participants to obtain the grand-averages for each of the two stress conditions.

295

296 **EEG analysis** The data were analyzed with the non-parametric  $t_{\max}$  permutation test (Groppe et al., 2011;  
297 Luck, 2014) using the Mass Univariate ERP Toolbox (Groppe et al., 2011) in Matlab (Mathworks, 2014).  
298 We were interested in modulations of the MMN as elicited by the presence/absence of IA and FA. Therefore,  
299 we specifically tested for differences in the time-windows between 201–301 ms and 551–651 ms, respectively.  
300 Furthermore, because the MMN is a fronto-centrally located deflection we specifically tested the Fz, Cz, FC1,  
301 FC2, C3, C4, F1, F2, F5h, F6h and FCz electrodes in both time-windows. Each comparison of interest was  
302 analyzed with a separate repeated measures, two-tailed  $t$ -tests, using the original data and 2500 random  
303 permutations to approximate the null distribution for the customary family-wise alpha ( $\alpha$ ) level of 0.05.

### 304 1.2.2 Results

305 Both  $-IA$  and  $-FA$  deviants elicited a MMN, although the MMN was smaller, and only marginally significant,  
306 when the deviant had been  $-IA$  (critical  $t$ -score:  $\pm 3.368$ ,  $p = 0.06$ ) compared to when the deviant had been  
307  $-FA$  (critical  $t$ -score:  $\pm 3.4322$ ,  $p < 0.05$ ) (see figure 4). This difference is interpreted in the main discussion  
308 of both oddball studies below.

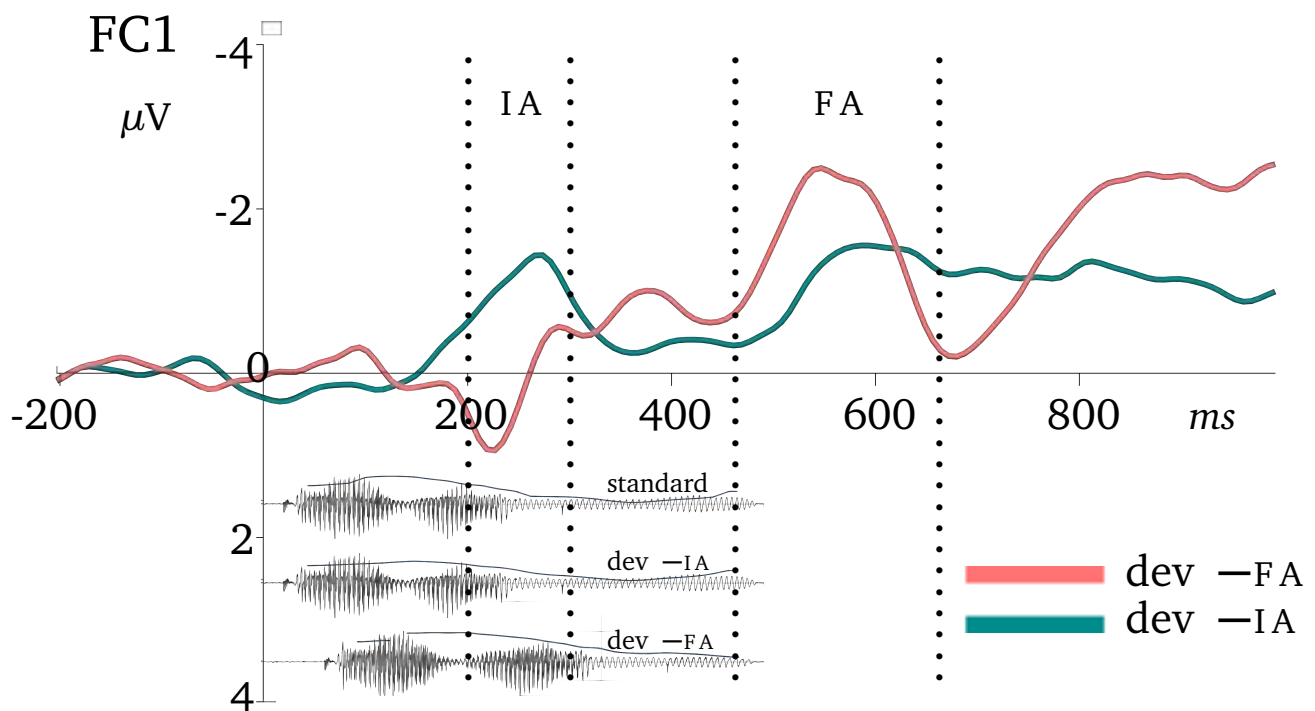

**Figure 4:** MMN components for  $-IA$  (in green) and  $-FA$  (in pink) deviants, recorded at the FC1 (left frontal) electrode, with the oscillogram of all stimuli type of [pavadi] plotted in the background. Waveforms and oscillograms are temporally aligned to indicate the relation between the offset of the  $\pm IA$  and  $\pm FA$  manipulation and the resulting stimulus-locked event-related potentials. Tested time-windows are indicated by dashed vertical lines. For ease of presentation, ERP waveforms are low-pass filtered at 10 Hz and negativity is plotted as an upward deflection.

## 309 2 Discussion

310 In the current studies, we sought to investigate the phonological representation of French accentuation. We  
311 took advantage of the MMN component, which is held to index the strength of memory traces underlying  
312 phonological information. We based our expectations on the results presented in Aguilera et al. (2014), which  
313 had previously shown the French secondary initial accent (IA) to be encoded in long-term memory and to be  
314 expected by listeners.

315 We were first specifically interested in the representation of the French primary final accent (FA) and  
316 manipulated its presence on trisyllabic words in an auditory oddball paradigm. There were two versions of this  
317 paradigm; in one version the standards were presented with FA, while the deviants were presented without FA,  
318 and in the other version, positions were reversed. As we will discuss in more detail below, our results clearly  
319 showed a pre-attentive expectation for words to be presented with final accent and a general dispreference  
320 for words presented without the accent. However, our results also partially deviated from those obtained in  
321 Aguilera et al. (2014), i.e. while the asymmetrical MMNs elicited by  $\pm$ FA deviants are congruent to the results  
322 reported in Aguilera et al. (2014), the comparisons between participants differed. In order to better understand  
323 this deviance between IA and FA, in a follow-up study, we orthogonally manipulated the presence of both the  
324 final accent and the initial accent within the same paradigm. That is, in this second study, both  $-$ FA and  $-$ IA  
325 stimuli served as deviants, while the standard was consistently presented with both the final and initial accent.  
326 We obtained MMN difference waves to both  $-$ IA and  $-$ FA deviants. The amplitudes of the respective MMNs,  
327 however, differed in size, possibly reflecting a different functional role for the accents in their marking of the  
328 word.

329 Below, we will discuss our findings in turn: In section 2.1, we present the results obtained in the first oddball  
330 study that show FA to not only be readily perceived, but also to be expected by the listener and phonologically  
331 natural. In section 2.2, we discuss the differential processing of  $-$ FA and  $-$ IA deviants. We will interpret the  
332 results from an acoustic, exogenous point of view, as well as inspect the possibility for this difference to reflect  
333 more substantial, endogenous differences in the functions of the respective accents during word processing.

### 334 2.1 Phonological representation of the French final accent

335 In the first oddball study, wherein we had concentrated on the representation of the French final accent, we  
336 observed an asymmetry between MMNs elicited by deviants presented without final accent, compared to those  
337 elicited by deviants that had been presented with final accent. More specifically, the MMN was significantly more  
338 ample when the deviant had been presented  $-$ FA, than when it had been presented  $+$ FA (see figure 2). This  
339 asymmetry indicates that the final accent is encoded in long-term memory, where it underlies the representation  
340 of the word.

341 Our comparisons between participants corroborate with this interpretation (see figure 3). Presenting words  
342 without final accent elicited an ample ERP deflection, *irrespective* of the position of the stimuli within the  
343 experimental setting. That is, words without final accent appeared to require more cognitive effort, *regardless*  
344 of whether they had been the standards or the deviants in the oddball paradigm. This result shows stress  
345 templates without FA to be generally disfavored. Indeed, if there had been no preference for one stress pattern  
346 over the other, then repeatedly presenting words without final accent (i.e. when  $-$ FA is in standard position)  
347 *should* have made the stress pattern  $-$ FA the probable stress template. Clearly, it did not; even in standard  
348 position, the stress pattern without final accent remained unexpected. In other words, listeners continued to  
349 anticipate words to be marked with final accent, most likely due to its established phonological representation.

350 The comparison between standards and deviants presented with final accent points to the same conclusion.  
351 In this comparison, position within the experimental setting *did* matter. Recall that the MMN may reflect both  
352 a prediction error when anticipations based on established phonological representations are violated, as well

353 as a mismatch within the experimental context. In the comparison between words +FA, interrupting a train  
354 of -FA stimuli with the sudden presentation of a template with FA, elicited a small prediction error, while  
355 no such prediction error followed the final accent when +FA stimuli were in the standard position. This  
356 finding again disproves the notion of stress deafness, i.e. listeners *readily notice* the accent when deviants  
357 +FA contrasted to the train of -FA templates. In other words, listeners detected FA when it mismatched the  
358 short-term anticipation established by the repeated stress templates -FA, negating their alleged phonological  
359 deafness. However, as was explained above, the mismatch did *not* result in a significant MMN (far from it,  
360 see figure 2), because presenting stimuli without final accent, even when congruent within the experimental  
361 setting (i.e. when -FA was in the standard position), remained unexpected due to the long-term phonological  
362 representation of the final accent.

363 In sum, we show that the final accent is readily perceived and elicits a small prediction error when it  
364 mismatches short-term memory, while stress patterns without final accent mismatch both short- *and* long-term  
365 memory representations and are thus not the expected metrical pattern in French.

## 366 2.2 Differential processing between the initial and final accents

367 While the asymmetrical MMNs elicited by  $\pm$ FA deviants are congruent to the results reported in Aguilera  
368 et al. (2014), the comparisons between participants differed. Where Aguilera and colleagues obtained a bigger  
369 difference wave after words were presented without IA underlying their stress template, even when comparing  
370 acoustically identical stimuli in both standard and deviant position, we obtained results opposite to that (i.e.  
371 there was a bigger difference between +FA stimuli than between -FA stimuli). To better understand this  
372 incongruence, in a follow-up study, we orthogonally manipulated the presence of both the final accent and the  
373 initial accent within the same paradigm. That is, in this second study, both -FA and -IA stimuli served as  
374 deviants, while the standard was consistently presented with both the final and the initial accent.

375 We obtained two consecutive MMN deflections, one reflecting the absence of IA, the other reflecting the  
376 absence of FA (see figure 4). The amplitudes of the MMNs were, however, different in size, with the MMN  
377 following deviants -FA being more ample than the MMN following deviants -IA. These results could inform  
378 us about differences in the strength of the memory representations between IA and FA, with the final accent  
379 holding a stronger memory trace and being anticipated to a greater extent by listeners than the initial accent.  
380 However, there are several alternative explanations which are also compatible, and, possibly, more likely explain  
381 the different MMNs: one reflecting a purely exogenous, acoustic interpretation, and the other involving a more  
382 substantial, endogenous difference in the accents' respective functions during speech processing. Both account  
383 are discussed below.

### 384 2.2.1 Exogenous interpretation

385 In the exogenous interpretation, the dissimilar MMN amplitudes between IA stimuli and FA stimuli reflect  
386 differences in acoustic processing. Indeed, the acoustic manipulations had not been the same between our  $\pm$ IA  
387 and  $\pm$ FA stimuli, the former involving exclusively a manipulation of the  $f_0$  rise, and the latter involving mainly  
388 a durational change. It is possible that French listeners are more sensitive to durational changes than to changes  
389 in pitch movement (see e.g. Partanen et al., 2011, for an MMN study showing just that for Finnish speakers,  
390 although also note that sensitivity to stress phonetic features is likely language specific). Moreover, while the  
391 presence of IA was *only* manipulated in  $f_0$ , the durational change of FA led to the additional disappearance of  
392 the accent's final rise (see figure 1), the secondary phonetic characteristic of FA. This means that stimuli without  
393 FA differed from stimuli with FA on two acoustic parameters, while  $\pm$ IA stimuli differed only in  $f_0$ . Because  
394 MMN amplitudes are held to reflect the *magnitude* of the deviance between standard stimuli and deviants  
395 (Sussman, 2007; Näätänen et al., 2007; Sussman et al., 2014; Sussman & Shafer, 2014), these exogenous

396 interpretations may at least in part explain the observed MMN differences between our  $-IA$  and  $-FA$  stimuli.

397 However, a purely acoustic interpretation less straightforwardly accounts for the different findings in the  
398 between participants comparisons observed in the current study versus those presented in Aguilera et al. (2014).  
399 Therefore, we consider it more likely that the dissimilar amplitudes reflect different respective roles for the  
400 accents during speech processing. Indeed, while the initial accent sits at the left word boundary and, as such,  
401 could signal word onsets and cue listeners on when to initiate lexical access, the final accent, which is located at  
402 the right word boundary, likely holds different functions, such as marking the word's offset and cue listeners on  
403 when to finalize their analysis of the word. In this view, the respective MMNs then reflect different interactions  
404 between the accents and the stages in speech perception, which we will turn to next.

405

### 406 2.2.2 Endogenous interpretation

407 Speech perception unfolds in three stages: an acoustic stage, during which the speech signal is spectrally decom-  
408 posed and distinguished from non-speech sounds, a pre-lexical stage, during which phonological information  
409 is assembled and matching lexical candidates are activated, and, finally, the lexical stage, wherein candidates  
410 compete and are evaluated up until one word can be selected for word recognition. In our view, the initial  
411 accent is more likely to interplay with the pre-lexical stage during which lexical hypotheses are derived and  
412 activated, while the final accent will presumably be more involved in the later lexical stage which ends in the  
413 recognition of the word. In terms of the Cohort model (Marslen-Wilson & Welsh, 1978; Wilson, 1990), the  
414 initial accent (the word's earliest phonological information) activates similar lexical representations into the,  
415 so-called, cohort. As the speech signal continues, matching candidates are additionally activated while, when  
416 words without final accents cease to match the activated representations, these are disregarded from the cohort  
417 or lessened in activation levels. In other words, the initial accent plausibly has more effect on the *start* of the  
418 process of word recognition and on early lexical activation levels, while the final accent is more likely involved  
419 in the *outcome* or *wrap-up* of the lexical competition.

420 Note that, in this view, dissimilar MMNs elicited by  $\pm IA$  versus  $\pm FA$  stimuli are not only explained in  
421 terms of different interactions during the process of word recognition, but also in terms of the precision of the  
422 prediction to which the stress patterns are compared. According to the theory of predictive coding, predic-  
423 tions which are precise require less additional cognitive effort than predictions which more generic. Stimuli  
424 without  $IA$  differ from the prediction phonologically, i.e. the listener has a general phonological preference  
425 or expectation for words to be presented with both  $IA$  and  $FA$  in their underlying stress templates. When the  
426 deviance is however later in the word, as with  $-FA$ , the listener's prediction more pointedly concerns the  
427 phonological stress template marking the right boundary of the particular lexical item expected from the train  
428 of standards. That is, one can imagine that, if  $FA$  cues the lexical offset, listeners could have imagined words  
429 without final accent to be part of, or embedded in, a longer word, therefore deleting the anticipated word  
430 boundary. Indeed, words can have other words partially or wholly embedded within them, such that the speech  
431 stream usually matches with multiple lexical candidates (*the embedding problem*, e.g. 'paradis' is a word on its  
432 own, but can also be at the onset of, for example, 'paradisique' or 'paradigmatique'). When presented stress  
433 patterns mismatch the expected stress template, this can lead to wrongfully deleting a word boundary. Indeed  
434 juncture misperception studies on English and Dutch, languages wherein stress is often word-initially (Cutler &  
435 Carter, 1987; Vroomen & de Gelder, 1995), have shown listeners to erroneously insert a word boundary when  
436 encountering a strong syllable (for instance, "analogy" → "an allergy") or delete a word boundary before a  
437 weak syllable (for instance, "my gorge is" → "my gorgeous") (e.g. Cutler & Butterfield, 1992; Vroomen et al.,  
438 1996).

439 In fact, also French listeners have been found to segment speech on  $FA$  in ambiguous sentences (see e.g.  
440 Banel & Bacri, 1994; Bagou et al., 2002; Christophe et al., 2004, for studies wherein  $FA$  signaled the right

441 phrase boundary). For example, Banel & Bacri (1994) found listeners to use the lengthened syllables as a right  
442 boundary cue and, consequently, segmented immediately after them. That is, when listeners were asked to  
443 interpret ambiguous speech sounds such as [bagaʒ] which may be segmented into two words ‘bas + gage’  
444 (low + pledge) or can be interpreted as ‘baggage’ (luggage), listeners favored the former interpretation when  
445 the syllables were marked with a trochaic stress template (long—short), while conversely favoring the latter  
446 interpretation when the stress template had been iambic (short—long). That is, lengthened syllables encour-  
447 aged a boundary to the right, while short syllables did not. Because, in French, prosodic descriptions do not  
448 include the lexical word, the boundary was attributed to the phrasal domain. However, it is possible that FA  
449 might have also cued the right lexical boundary in that study.

450 Similarly, in the study on the interaction between metrical structure and semantic processing, Magne et al.  
451 (2007) artificially lengthened the medial syllable. This metrical ‘incongruity’ was found to obstruct semantic  
452 processing, possibly because listeners segmented speech on the medial syllable and, thus, before the word’s  
453 actual offset. In the current study, shortening the final syllable in the deviant position, may have led the deviant  
454 to not only mismatch with the anticipated phonological stress template, but change the predicted lexical item  
455 because it was missing its right boundary mark (e.g. “paradis” → “paradigmatique”). That is, listeners may  
456 have noticed the acoustic mismatch (i.e. syllable length and  $f_0$  movement), the phonological incongruence  
457 (i.e.  $\pm$ FA), and the lexical difference (‘paradis’ → ‘paradigmatique’). In other words, repeatedly presenting  
458 the same lexical item in the standard position, led to more specific anticipations and activations of lexical  
459 candidates, which, in turn, resulted in MMNs reflecting the concurrent detection of several deviances: (1) the  
460 acoustic deviance, (2) the phonological mismatch and, possibly, (3) the mismatch to the lexical prediction  
461 (see e.g. Pulvermüller & Shtyrov, 2006; Jacobsen et al., 2004; Honbolygó et al., 2004; Honbolygó & Csépe,  
462 2013; Honbolygó et al., 2017; Ylinen et al., 2009; Garami et al., 2017; Zora et al., 2016, for oddball studies  
463 investigating obstructed processing due to mismatching stress templates on words and/or pseudowords in  
464 Hungarian, Finnish and Swedish).

465 However, if the differences between IA and FA reflect interactions with different stages during word recog-  
466 nition, then, while interesting, the oddball paradigm (and MMN) unfortunately is not well suited to observe  
467 them. Clearly, oddball paradigms provide a rather artificial listening situation, wherein it is not clear whether  
468 each word presentation (whether in standard position or as deviant) encourages a fresh attempt to lexical  
469 access. That is, arguably the repeated presentation of the same word may involve a process different from  
470 normal listening situations wherein listeners go through all three stages of word recognition. Future studies  
471 adopting different paradigms that encourage lexical access (e.g. a lexical decision paradigm) may be better  
472 suited to observe the possibly differential contributions of IA and FA to the process of word recognition.

### 473 3 Conclusion

474 In sum, in this oddball study, we investigated the cognitive representation of the French accentuation. The  
475 French initial accent had previously been shown to not only be readily perceived but expected by French listeners  
476 as part of the stress pattern underlying the lexical word, indicative of a functional role in their analysis of speech.  
477 The results of the present study show that FA—just as IA—is not only perceived, but anticipated by listeners  
478 as belonging to the abstract representation of the word. Unlike the results reported in Aguilera et al. (2014),  
479 when the standard was presented without FA, it remained unexpected, despite its high probability within  
480 the experimental context. This result suggests that the deviant without FA remained improbable within the  
481 experimental setting, indicating a long-term representation of the accent and underlining listeners’ expectation  
482 for words to be marked by stress templates which also include FA. Moreover, we observed an asymmetry  
483 between deviants presented with FA and deviants presented without, with larger MMN amplitudes when the  
484 deviant had been presented without FA. In this respect, the results are congruent to the asymmetrical MMNs

485 reported in Aguilera et al. (2014) in which IA had been manipulated, and, together, the results are in line  
486 with Di Cristo's model, and demonstrate a cognitive, phonological expectation for metrically strong syllables  
487 at both left and right lexical boundaries. Altogether, the results contradict the traditionally accepted view of  
488 French as a language without accent and, instead, suggest accentuation to have a functional role in word level  
489 processing.

#### 490 **Acknowledgments**

491 This study was supported by the Agence Nationale de la Recherche grant ANR-12-BSH2-0001 (PI: Corine  
492 Astésano).



## 493 **References**

- 494 Aguilera, M., El Yagoubi, R., Espesser, R., & Astésano, C. 2014. Event-Related Potential investigation of Initial  
495 Accent processing in French. *Speech Prosody 2014*, 383–387.
- 496 Astésano, C. 2001. *Rythme et accentuation en français: invariance et variabilité stylistique*. L'Harmattan.
- 497 Astésano, C. 2017. *Le statut de l'Accent Initial dans la phonologie prosodique du français: enjeux descriptifs et*  
498 *psycholinguistiques*. Habilitat, UT2J.
- 499 Astésano, C. & Bertrand, R. 2016. Accentuation et niveaux de constituance en français : enjeux phonologiques  
500 et psycholinguistiques. *Langue française* NÂ° 191.11–30.
- 501 Astésano, C., Bertrand, R., Espesser, R., & Nguyen, N. 2012. Perception des frontières et des proéminences en  
502 français. *Actes de la conférence conjointe JEP-TALN-RECITAL*, 353–360.
- 503 Astésano, C., te Rietmolen, N., Espesser, R., & El Yagoubi, R. *in prep*. Event-Related Potential investigation of  
504 Initial Accent processing in French.
- 505 Bagou, O., Fougeron, C., & Frauenfelder, U. H. 2002. Contribution of prosody to the segmentation and storage  
506 of words in the acquisition of a new mini-language. *Speech Prosody 2002, International Conference*.
- 507 Banel, M.-H. & Bacri, N. 1994. On metrical patterns and lexical parsing in French. *Speech Commun.* 15.115–  
508 126.
- 509 Boersma, P. & Weenink, D. 2016. Praat software. University of Amsterdam.
- 510 Christophe, A., Peperkamp, S., Pallier, C., Block, E., & Mehler, J. 2004. Phonological phrase boundaries  
511 constrain lexical access I. Adult data. *J. Mem. Lang.* 51.523–547.
- 512 Colin, C., Hoonhorst, I., Markessis, E., Radeau, M., de Tourtchaninoff, M., Foucher, A., Collet, G., & Deltenre,  
513 P. 2009. Mismatch negativity (MMN) evoked by sound duration contrasts: an unexpected major effect of  
514 deviance direction on amplitudes. *Clin. Neurophysiol.* 120.51–59.
- 515 Cutler, A. & Butterfield, S. 1992. Rhythmic cues to speech segmentation: Evidence from juncture misperception.  
516 *J. Mem. Lang.* 31.218–236.
- 517 Cutler, A. & Carter, D. M. 1987. The predominance of strong initial syllables in the English vocabulary. *Comput.*  
518 *Speech Lang.* 2.133–142.
- 519 Deguchi, C., Chobert, J., Brunellière, A., Nguyen, N., Colombo, L., & Besson, M. 2010. Pre-attentive and  
520 attentive processing of French vowels. *Brain Res.* 1366.149–161.
- 521 Delorme, A. & Makeig, S. 2004. EEGLAB: an open source toolbox for analysis of single-trial EEG dynamics  
522 including independent component analysis. *J. Neurosci. Methods* 134.9–21.
- 523 Denham, S. L. & Winkler, I. 2017. Predictive coding in auditory perception: challenges and unresolved  
524 questions. *Eur. J. Neurosci.*
- 525 Di Cristo, A. 1999. Vers une modélisation de l'accentuation du français: première partie. *Journal of French*  
526 *language studies* 9.143–179.
- 527 Di Cristo, A. 2000. Vers une modélisation de l'accentuation du français (seconde partie). *Journal of French*  
528 *language studies* 10.27–44.

- 529 Dupoux, E., Pallier, C., Sebastian, N., & Mehler, J. 1997. A Destressing “Deafness” in French? *J. Mem. Lang.*  
530 36.406–421.
- 531 Eulitz, C. & Lahiri, A. 2004. Neurobiological evidence for abstract phonological representations in the mental  
532 lexicon during speech recognition. *J. Cogn. Neurosci.* 16.577–583.
- 533 Garami, L., Ragó, A., Honbolygó, F., & Csépe, V. 2017. Lexical influence on stress processing in a fixed-stress  
534 language. *Int. J. Psychophysiol.* 117.10–16.
- 535 Garnier, L. 2018. *Quels liens entre accentuation et niveaux de constituance en français? Une analyse perceptive et*  
536 *acoustique*. UT2J, Toulouse dissertation.
- 537 Garnier, L., Baqué, L., Dagnac, A., & Astésano, C. 2016. Perceptual investigation of prosodic phrasing in French.  
538 *Speech Prosody 2016*.
- 539 Garrido, M. I., Kilner, J. M., Stephan, K. E., & Friston, K. J. 2009. The mismatch negativity: a review of  
540 underlying mechanisms. *Clin. Neurophysiol.* 120.453–463.
- 541 Groppe, D. M., Urbach, T. P., & Kutas, M. 2011. Mass univariate analysis of event-related brain potentials/fields  
542 I: a critical tutorial review. *Psychophysiology* 48.1711–1725.
- 543 Honbolygó, F. & Csépe, V. 2013. Saliency or template? ERP evidence for long-term representation of word  
544 stress. *Int. J. Psychophysiol.* 87.165–172.
- 545 Honbolygó, F., Csépe, V., & Ragó, A. 2004. Suprasegmental speech cues are automatically processed by the  
546 human brain: a mismatch negativity study. *Neurosci. Lett.* 363.84–88.
- 547 Honbolygó, F., Kolozsvári, O., & Csépe, V. 2017. Processing of word stress related acoustic information: A  
548 multi-feature MMN study. *Int. J. Psychophysiol.* 118.9–17.
- 549 Jacobsen, T., Horváth, J., Schröger, E., Lattner, S., Widmann, A., & Winkler, I. 2004. Pre-attentive auditory  
550 processing of lexicality. *Brain Lang.* 88.54–67.
- 551 Jacobsen, T. & Schröger, E. 2003. Measuring duration mismatch negativity. *Clin. Neurophysiol.* 114.1133–  
552 1143.
- 553 Jankowski, L., Astésano, C., & Di Cristo, A. 1999. The initial rhythmic accent in French: Acoustic data and  
554 perceptual investigation. *Proceedings of the 14th International Congress of Phonetic Sciences*, vol. 1, 257–260.
- 555 Jun, S.-A. & Fougeron, C. 2000. A Phonological Model of French Intonation. *Intonation: Analysis, Modelling*  
556 *and Technology*, ed. by Antonis Botinis, Text, Speech and Language Technology, 209–242. Dordrecht: Springer  
557 Netherlands.
- 558 Klatt, D. H. 1976. Linguistic uses of segmental duration in English: acoustic and perceptual evidence. *J. Acoust.*  
559 *Soc. Am.* 59.1208–1221.
- 560 Luck, S., Huang, S., & Lopez-Calderon, J. 2010. *Erplab toolbox*.
- 561 Luck, S. 2014. The Mass Univariate Approach and Permutation Statistics. *ERP analysis*.
- 562 Magne, C., Astésano, C., Aramaki, M., Ystad, S., Kronland-Martinet, R., & Besson, M. 2007. Influence of  
563 syllabic lengthening on semantic processing in spoken French: behavioral and electrophysiological evidence.  
564 *Cereb. Cortex* 17.2659–2668.

- 565 Manly, B. F. J. 2006. *Randomization, Bootstrap and Monte Carlo Methods in Biology, Third Edition*. CRC Press.
- 566 Marslen-Wilson, W. D. & Welsh, A. 1978. Processing interactions and lexical access during word recognition  
567 in continuous speech. *Cogn. Psychol.* 10.29–63.
- 568 Mathworks, I. 2014. MATLAB: R2014a.
- 569 Michelas, A., Esteve-Gibert, N., & Dufour, S. 2018. On French listeners' ability to use stress during spoken  
570 word processing. *J. Cogn. Psychol.* 30.198–206.
- 571 Michelas, A., Frauenfelder, U. H., Schön, D., & Dufour, S. 2016. How deaf are French speakers to stress? *J.*  
572 *Acoust. Soc. Am.* 139.1333–1342.
- 573 Näätänen, R., Lehtokoski, A., Lennes, M., Cheour, M., Huotilainen, M., Iivonen, A., Vainio, M., Alku, P., Il-  
574 moniemi, R. J., Luuk, A., Allik, J., Sinkkonen, J., & Alho, K. 1997. Language-specific phoneme representations  
575 revealed by electric and magnetic brain responses. *Nature* 385.432–434.
- 576 Näätänen, R., Paavilainen, P., Rinne, T., & Alho, K. 2007. The mismatch negativity (MMN) in basic research of  
577 central auditory processing: a review. *Clin. Neurophysiol.* 118.2544–2590.
- 578 Partanen, E., Vainio, M., Kujala, T., & Huotilainen, M. 2011. Linguistic multifeature MMN paradigm for  
579 extensive recording of auditory discrimination profiles. *Psychophysiology* 48.1372–1380.
- 580 Pulvermüller, F. & Shtyrov, Y. 2006. Language outside the focus of attention: the mismatch negativity as a tool  
581 for studying higher cognitive processes. *Prog. Neurobiol.* 79.49–71.
- 582 Rossi, M. 1980. Le français, langue sans accent? *L'accent en français contemporain (Studia Phonetica)*, ed. by  
583 I Fonagy and P Leon, vol. 15, 13–51.
- 584 Rossi, M. 1972. Le seuil différentiel de durée. *Papers in Linguistics and Phonetics to the memory of Pierre*  
585 *Delattre* 54.435.
- 586 Scharinger, M., Monahan, P. J., & Idsardi, W. J. 2016. Linguistic category structure influences early auditory  
587 processing: Converging evidence from mismatch responses and cortical oscillations. *Neuroimage* 128.293–  
588 301.
- 589 Scharinger, M., Steinberg, J., & Tavano, A. 2017. Integrating speech in time depends on temporal expectancies  
590 and attention. *Cortex* 93.28–40.
- 591 Sussman, E. S., Chen, S., Sussman-Fort, J., & Dinces, E. 2014. The five myths of MMN: redefining how to use  
592 MMN in basic and clinical research. *Brain Topogr.* 27.553–564.
- 593 Sussman, E. 2007. A New View on the MMN and Attention Debate: The Role of Context in Processing Auditory  
594 Events. *J. Psychophysiol.* 21.164–175.
- 595 Sussman, E. S. & Shafer, V. L. 2014. New perspectives on the mismatch negativity (MMN) component: an  
596 evolving tool in cognitive neuroscience. *Brain Topogr.* 27.425–427.
- 597 Vroomen, J., van Zon, M., & de Gelder, B. 1996. Cues to speech segmentation: evidence from juncture  
598 misperceptions and word spotting. *Mem. Cognit.* 24.744–755.
- 599 Vroomen, J. & de Gelder, B. 1995. Metrical segmentation and lexical inhibition in spoken word recognition. *J.*  
600 *Exp. Psychol. Hum. Percept. Perform.* 21.98–108.

- 601 Wilson, M. 1990. Activation, Competition, and Frequency in Lexical Access. *Cognitive Models of Speech*  
602 *Processing*, ed. by G T M Altmann, 148–172. The MIT Press.
- 603 Winkler, I., Denham, S. L., & Nelken, I. 2009. Modeling the auditory scene: predictive regularity representations  
604 and perceptual objects. *Trends Cogn. Sci.* 13.532–540.
- 605 Ylinen, S., Huuskonen, M., Mikkola, K., Saure, E., Sinkkonen, T., & Paavilainen, P. 2016. Predictive coding of  
606 phonological rules in auditory cortex: A mismatch negativity study. *Brain Lang.* 162.72–80.
- 607 Ylinen, S., Strelnikov, K., Huotilainen, M., & Näätänen, R. 2009. Effects of prosodic familiarity on the automatic  
608 processing of words in the human brain. *Int. J. Psychophysiol.* 73.362–368.
- 609 Zora, H., Riad, T., Schwarz, I.-C., & Heldner, M. 2016. Lexical Specification of Prosodic Information in Swedish:  
610 Evidence from Mismatch Negativity. *Front. Neurosci.* 10.533.
